# Supplementary material
Source: PubMed Central journal article supplement (PMC5374455)
Supplement: Supplemental_Table3.pdf [file Supplemental_Table3.pdf]

**Supplemental Table 3. Most significantly enriched up-regulated pathways.**

| <b>Ingenuity Canonical Pathways</b>                                          | <b>FDR</b> | <b>Ratio</b> | <b>z-score</b> | <b>Molecules</b>                                                                                                                                                                                                                                                                                                                                                                                       |
|------------------------------------------------------------------------------|------------|--------------|----------------|--------------------------------------------------------------------------------------------------------------------------------------------------------------------------------------------------------------------------------------------------------------------------------------------------------------------------------------------------------------------------------------------------------|
| Granulocyte Adhesion and Diapedesis                                          | 1.26E-22   | 0.32         | NaN            | SELL, MMP3, CCL17, MMP13, IL1R2, CXCL10, IL1RL2, CXCL14, Cxcl3, Ccl6, TNFRSF11B, ITGA4, CSF3R, SELE, PF4, THY1, FPR1, IL33, IL18, ITGAM, IL1RN, ITGA1, TNF, MMP14, CCL22, SDC3, CCL5, MMP25, IL36G, CCL2, CCL3L3, Ccl8, CXCR2, Ccl2, TNFRSF1B, MMP19, VCAM1, C5AR1, CXCR4, ITGA2, FPR2, CKLF, GNAI1, ITGAL, CXCL6, Ccl9, SELPLG, IL18RAP, CXCL16, ITGB2, CCL27, CCL21, IL1B, CXCL2, MMP9, CLDN22, Ccl7 |
| Agranulocyte Adhesion and Diapedesis                                         | 7.94E-16   | 0.27         | NaN            | MYH10, SELL, MMP3, CCL17, MMP13, CXCL10, CXCL14, ACTG2, Cxcl3, Ccl6, ITGA4, SELE, PF4, IL33, IL18, IL1RN, ITGA1, TNF, AOC3, MMP14, CCL22, CCL5, MYH11, MMP25, ITGB7, IL36G, CCL2, Ccl8, CXCR2, CCL3L3, Ccl2, MMP19, VCAM1, C5AR1, CXCR4, ITGA2, GNAI1, CKLF, CXCL6, SELPLG, Ccl9, CXCL16, ITGB2, CCL27, CCL21, IL1B, CXCL2, CLDN22, MMP9, Ccl7                                                         |
| Role of Pattern Recognition Receptors in Recognition of Bacteria and Viruses | 6.31E-15   | 0.31         | 5              | PIK3R5, TLR8, C1QC, C1QA, C1QB, CCL5, IL6, RNASEL, IL17B, IFIH1, TGFB1, PIK3CG, TLR1, CASP1, TLR7, OSM, CLEC6A, PTX3, OAS1, C5AR1, NLRP3, OAS2, MYD88, OAS3, TLR9, TLR2, IRF7, CLEC7A, IL18, TLR5, SYK, PLCG2, TLR6, TGFB3, IL1B, PIK3CD, TNF, C3AR1, PRKCB                                                                                                                                            |

|                                                                                |          |      |       |                                                                                                                                                                                                                                                                                                                                                                                                                  |
|--------------------------------------------------------------------------------|----------|------|-------|------------------------------------------------------------------------------------------------------------------------------------------------------------------------------------------------------------------------------------------------------------------------------------------------------------------------------------------------------------------------------------------------------------------|
| Dendritic Cell Maturation                                                      | 1.00E-13 | 0.25 | 5.284 | PLCB2, LEPR, NFKBIE, HLA-DQA1, PIK3R5, HLA-DQB1, IL6, FCGR2B, FCGR1A, MAPK11, IL36G, IL1RL2, HLA-DMA, PIK3CG, HLA-DMB, LY75, PLCL1, STAT1, TNFRSF1B, FCGR3A/FCGR3B, TNFRSF11B, TYROBP, FCGR2A, MYD88, PLCL2, TLR9, TLR2, STAT4, IL33, PLCB4, IL18, CD80, IL1RN, PLCG2, FSCN1, TREM2, FCER1G, CD86, IL1B, STAT2, PIK3CD, IRF8, TNF, CCR7, HLA-DRB5                                                                |
| Leukocyte Extravasation Signaling                                              | 1.58E-12 | 0.23 | 3.569 | RAC2, MMP3, MMP14, CTNNA3, PIK3R5, MMP13, MMP25, RHOH, MAPK11, TIMP1, PIK3CG, CYBA, CYBB, ACTG2, MMP19, ITGA4, VCAM1, CXCR4, ACTN2, ITGA2, GNAI1, ARHGAP4, THY1, BMX, NCF4, ITGAL, SELPLG, TEC, ROCK1, BTK, ITGB2, TIMP4, NCF1, ITGAM, ARHGAP9, WAS, PLCG2, RASGRP1, NCF2, CD44, ITGA1, VAV1, PIK3CD, CLDN22, MMP9, PRKCB                                                                                        |
| Role of Macrophages, Fibroblasts and Endothelial Cells in Rheumatoid Arthritis | 1.58E-12 | 0.20 | NaN   | SOCS3, PLCB2, MMP3, TLR8, MMP13, IL6, FCGR1A, MYC, IL1R2, WIF1, IL1RL2, TGFB1, PIK3CG, TLR1, OSM, PLCL1, TNFRSF11B, ADAMTS4, SELE, MIF, IL6R, PLCL2, TLR9, TLR2, IL33, IL18, IL1RN, PLCG2, PIK3CD, PDGFD, TNF, NFKBIE, PIK3R5, CCL5, IL17RA, PGF, IL36G, CCL2, TLR7, NOS2, TNFRSF1B, FCGR3A/FCGR3B, VCAM1, C5AR1, MYD88, CEBPB, TCF7L1, IL18RAP, ROCK1, FZD8, PLCB4, TLR5, TLR6, Tlr13, IL1B, SOST, PRKCB, WNT5A |
| phagosome formation                                                            | 1.00E-11 | 0.29 | NaN   | MRC1, PLCB2, MSR1, PIK3R5, TLR8, FCGR2B, FCGR1A, RHOH, RHOG, PIK3CG, TLR1, TLR7,                                                                                                                                                                                                                                                                                                                                 |

|                                                     |          |      |     |                                                                                                                                                                                                                                                                                       |
|-----------------------------------------------------|----------|------|-----|---------------------------------------------------------------------------------------------------------------------------------------------------------------------------------------------------------------------------------------------------------------------------------------|
|                                                     |          |      |     | PLCL1, FCGR3A/FCGR3B, ITGA4, FCGR2A, ITGA2, PLCL2, TLR9, INPP5D, TLR2, PLCB4, CLEC7A, Fcrls, TLR5, SYK, PLCG2, TLR6, FCER1G, Tlr13, PIK3CD, PRKCB                                                                                                                                     |
| IL-10 Signaling                                     | 1.23E-10 | 0.35 | NaN | CCR1, SOCS3, CCR5, IL4R, FCGR2A, NFKBIE, ARG2, IL6, FCGR2B, MAPK11, IL18RAP, IL1R2, IL33, HMOX1, IL36G, IL18, IL1RL2, IL1RN, IL10RA, IL10RB, CD14, IL1B, LBP, TNF                                                                                                                     |
| TREM1 Signaling                                     | 1.66E-10 | 0.33 | 5   | Naip1 (includes others), TREM1, NLRP3, TYROBP, MYD88, TLR8, LAT2, IL6, TLR9, FCGR2B, TLR2, NLRC5, IL18, TLR5, CCL2, PLCG2, TLR6, TLR1, CASP1, TLR7, IL1B, CD86, Tlr13, TNF, ITGAX                                                                                                     |
| Hepatic Fibrosis / Hepatic Stellate Cell Activation | 2.95E-10 | 0.22 | NaN | MYH10, CCR5, COL4A5, LEPR, COL4A3, MMP13, COL8A1, MYH11, CCL5, IL6, COL6A6, PGF, IL1R2, IL1RL2, CCL2, TIMP1, TGFB1, HGF, LBP, STAT1, TNFRSF1B, TNFRSF11B, VCAM1, IL4R, EDNRB, COL12A1, IL6R, FGFR2, IL18RAP, CCL21, IL10RA, IGFBP3, TGFB3, CD14, IL1B, COL4A4, PDGFD, TNF, MMP9, CCR7 |

Ingenuity analysis of RNAs up-regulated greater than or equal to 2-fold. The ratio indicates the proportion of genes in the pathway whose expression was altered. The z-score indicates the relative activation (positive numbers) or repression (negative numbers) of the pathway. NaN –not able to be determined.
